# Supplementary material for: Peripheral Blood DNA Methylation Profiles Do Not Predict Endoscopic Post-Operative Recurrence in Crohn’s Disease Patients
Source: MDPI journal article supplement (doi:10.3390/ijms231810467), 2022-09-09
Supplement: s1 [file s1]

## Supplementary tables

**Table S1.** Modified Rutgeerts' score<sup>62</sup>.

|            |                                                                                                                                   |
|------------|-----------------------------------------------------------------------------------------------------------------------------------|
| <b>i0</b>  | No lesions in the distal ileum                                                                                                    |
| <b>i1</b>  | <5 aphthous lesions in the distal ileum                                                                                           |
| <b>i2a</b> | Lesions confined to the ileocolonic anastomosis (including anastomotic stenosis)                                                  |
| <b>i2b</b> | ≥5 aphthous lesions or larger lesions, with normal mucosa in-between, in the neoterminal ileum (with or without anastomotic line) |
| <b>i3</b>  | Diffuse aphthous ileitis with diffusely inflamed mucosa                                                                           |
| <b>i4</b>  | Large ulcers with diffuse mucosal inflammation or nodules or stenosis in the neoterminal ileum                                    |

## Supplementary figures

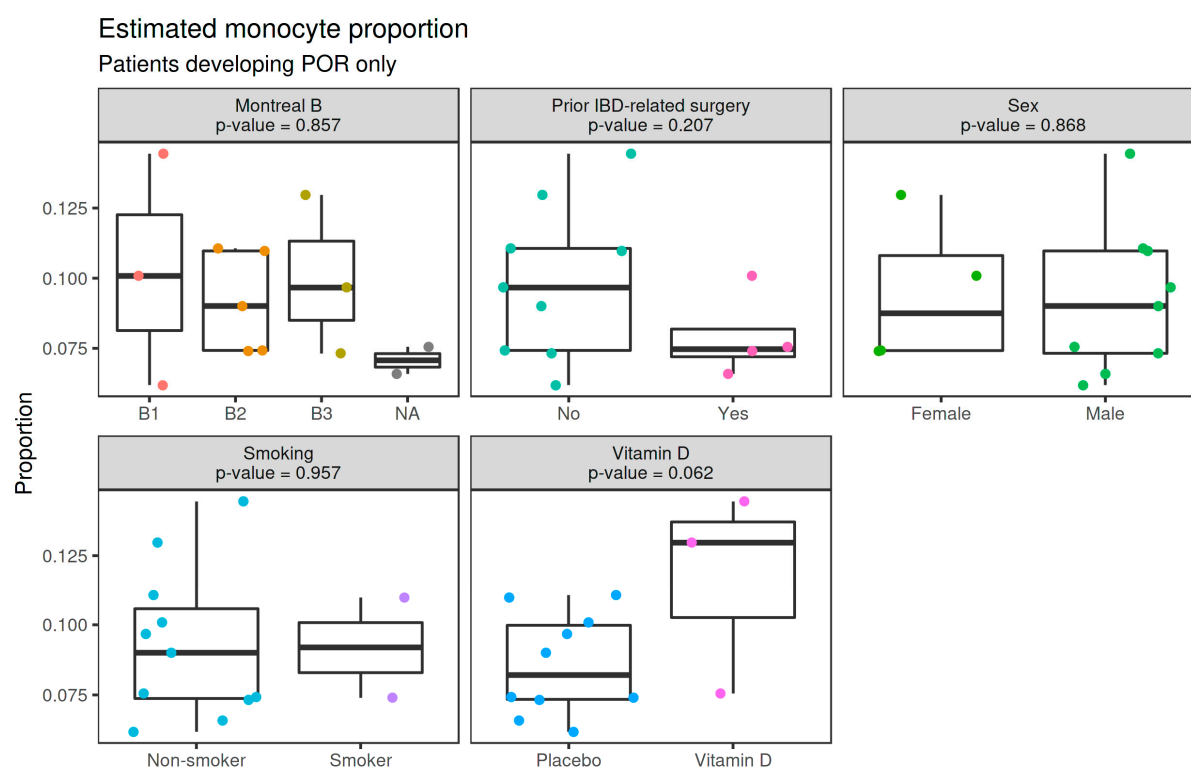

**Supplementary Figure S1.** Association of clinical parameters with estimated monocyte proportion. We estimated the blood cell distribution of the monocytes, NK-cells, CD8+ T-cells, B-cells, CD4+ T-cells and neutrophils using the IDOL dataset. The x-axis of each box indicates the difference between patients that remain in endoscopic remission (orange) vs. POR (blue), with corresponding p-values as—calculated using two-sample *t*-tests—shown above. The y-axis of each box shows the proportion of that particular cell type. A significantly higher proportion of monocytes at baseline were observed for patients that ultimately developed POR.
